# Supplementary material for: Genome-wide analyses identify KLF4 as an important negative regulator in T-cell acute lymphoblastic leukemia through directly inhibiting T-cell associated genes
Source: PubMed Central journal article supplement (PMC4350611; doi:10.1186/s12943-014-0285-x), 2015-02-03

# Supplementary Figure 1

LTR PPT TRE KLF4 W LTR TRE-KLF4

LTR PPT TRE W LTR TRE-empty

LTR PPT EF1a rtTA 2A GFP W LTR RTTA-GFP

LTR PPT EF1a KLF4 2A GFP W LTR KLF4-GFP

LTR PPT EF1a GFP W LTR GFP

LTR PPT EF1a BCL2 2A KLF4 2A GFP W LTR KLF4-BCL2

LTR PPT EF1a BCLXL 2A KLF4 2A GFP W LTR KLF4-BCLXL

LTR PPT EF1a GATA3 2A KLF4 2A GFP W LTR KLF4-GATA3

LTR PPT EF1a ICN1 2A KLF4 2A GFP W LTR KLF4-ICN1

# Supplementary Figure 2

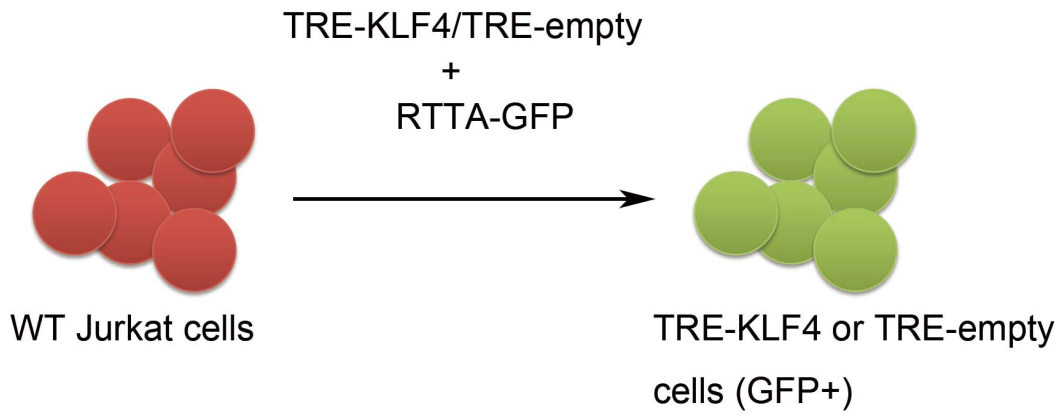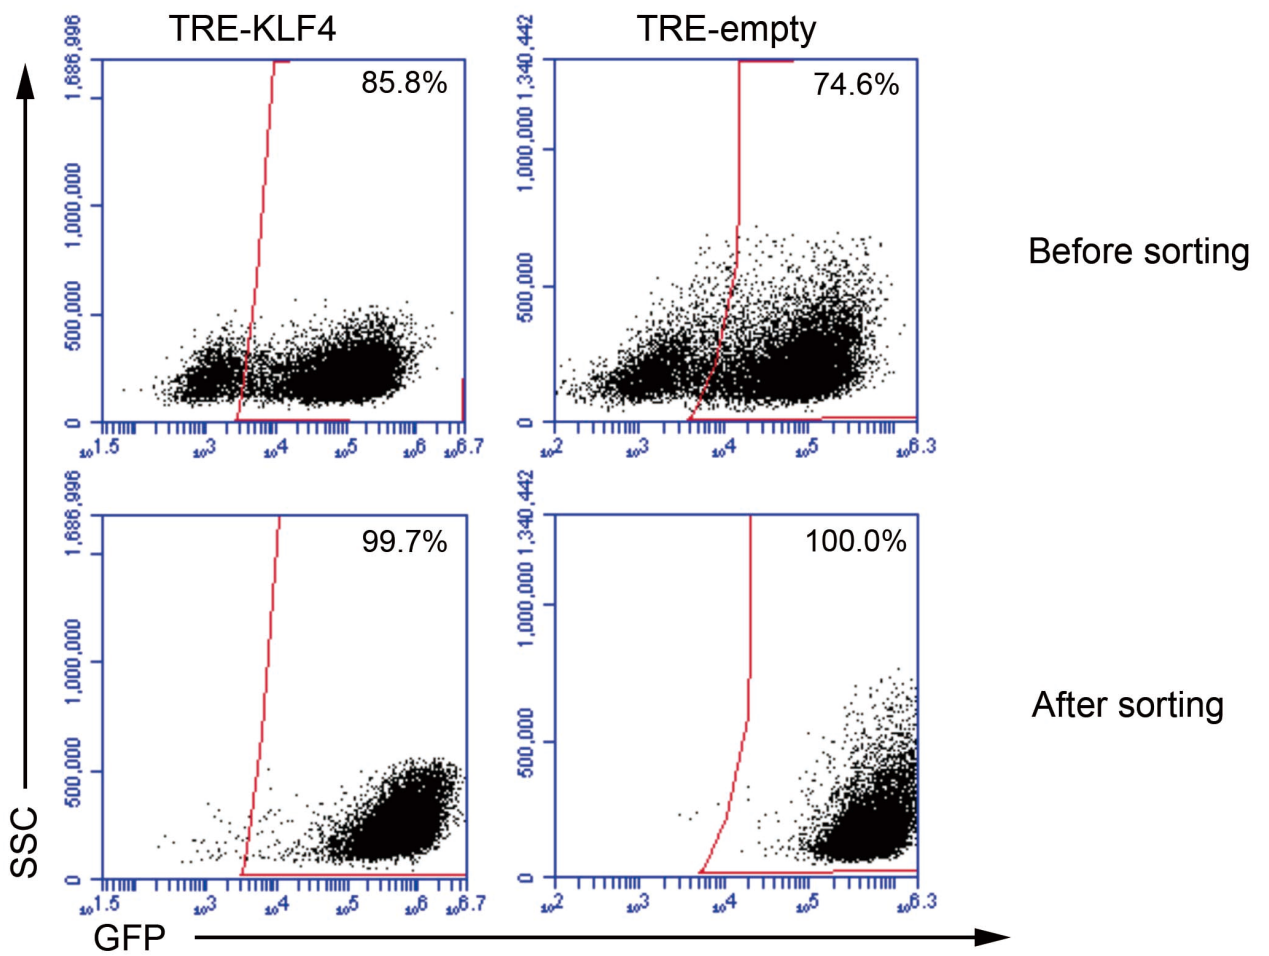

### Supplementary Figure 3

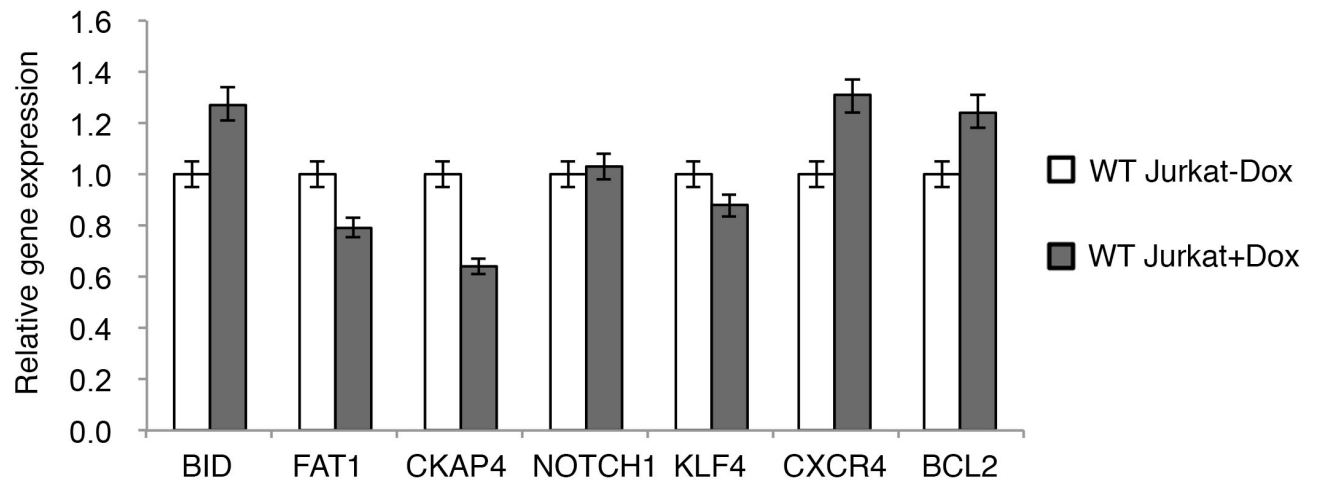

# Supplementary Figure 4

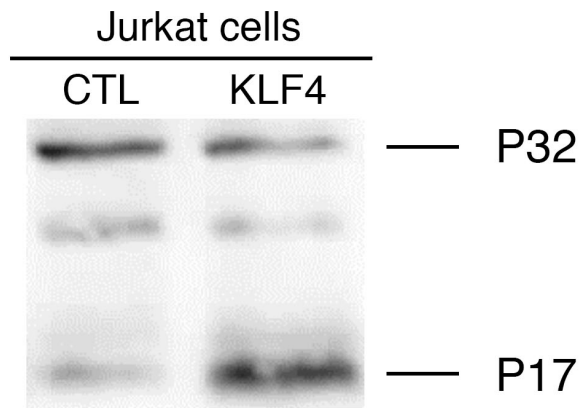

# Supplementary Figure 5

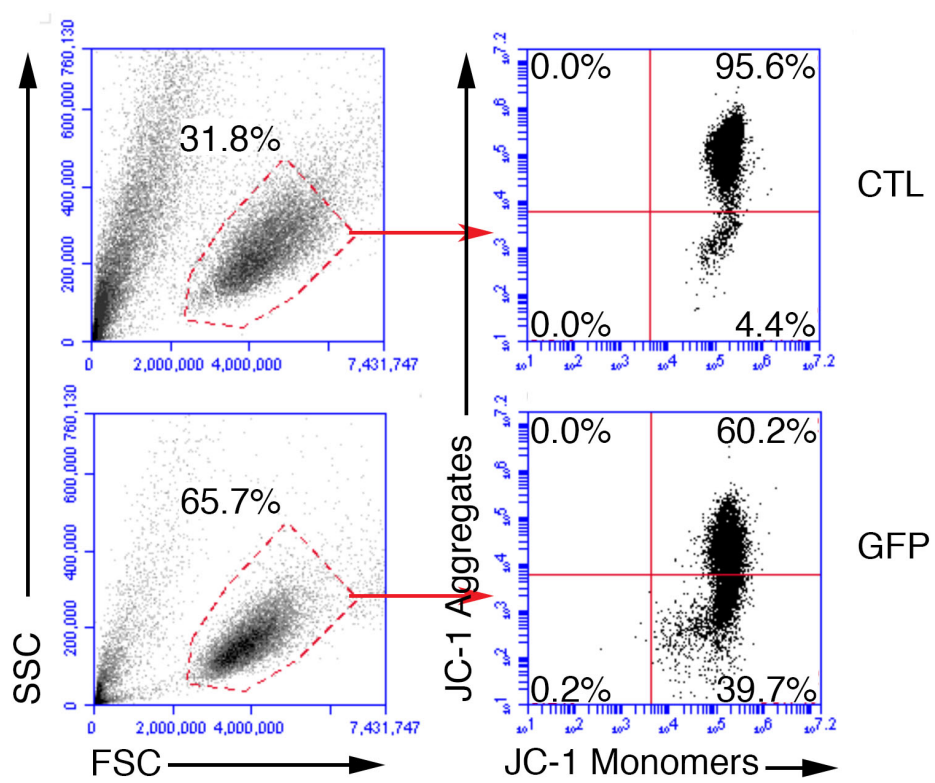

# Supplementary Figure 6

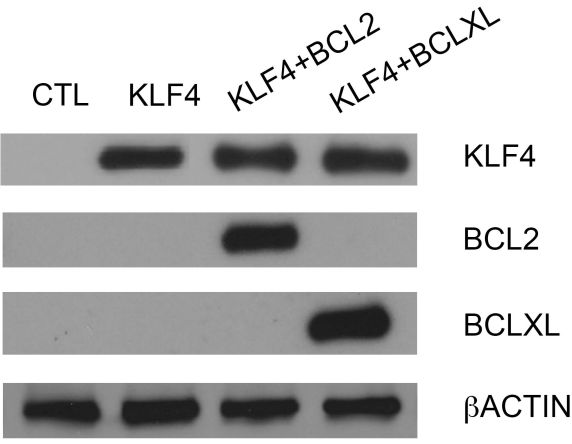

Supplementary Figure 7

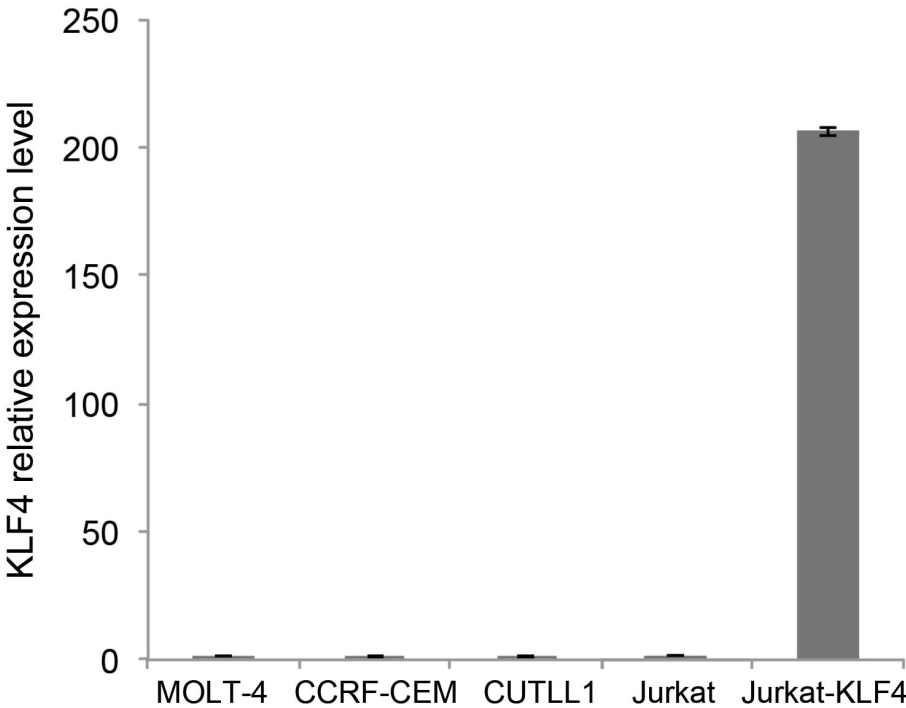

# Supplementary Figure 8

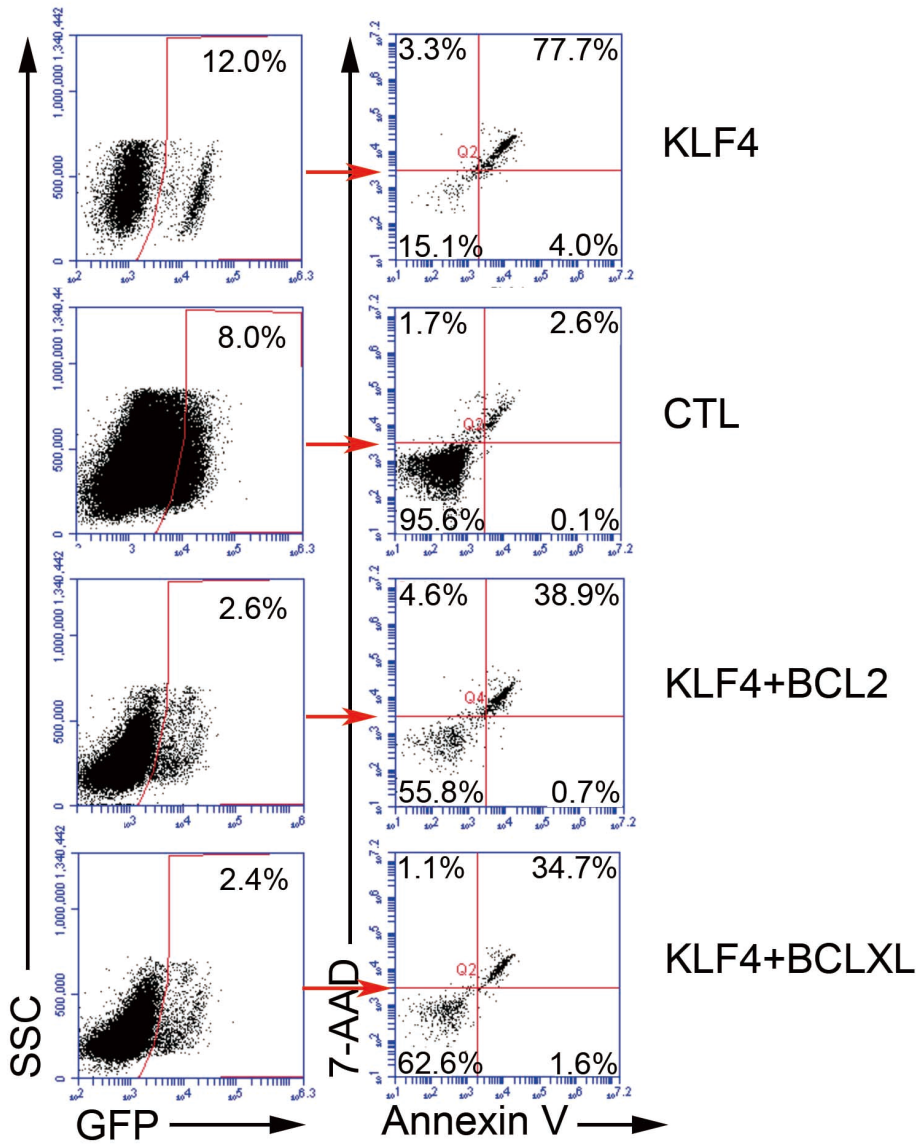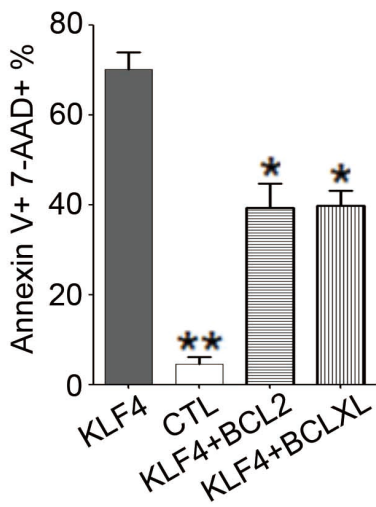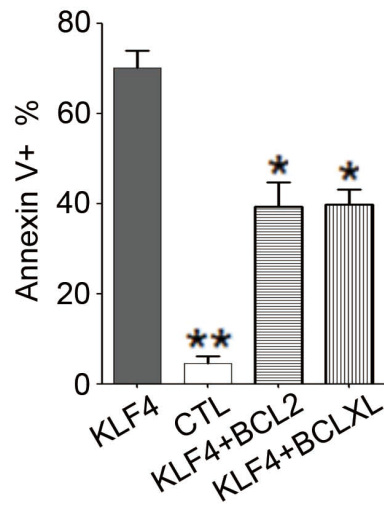



# Supplementary Figure 9

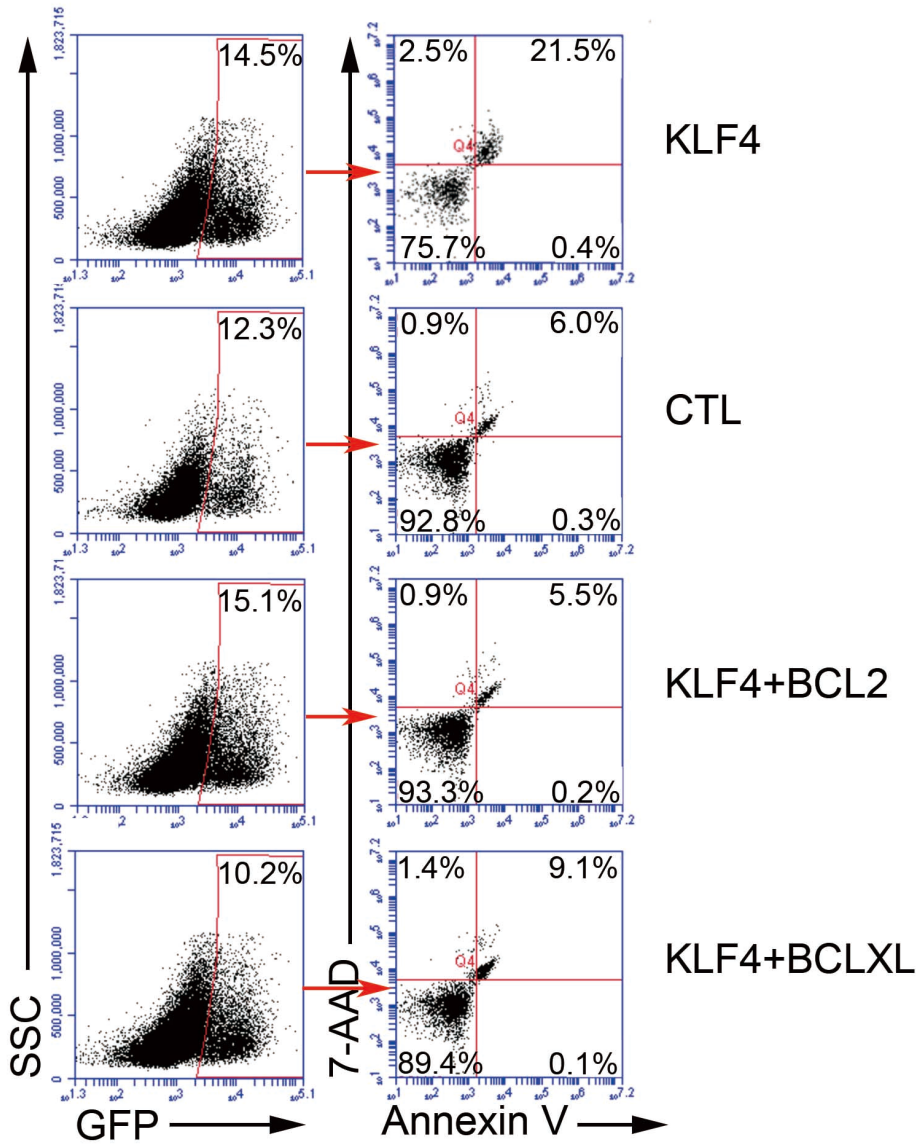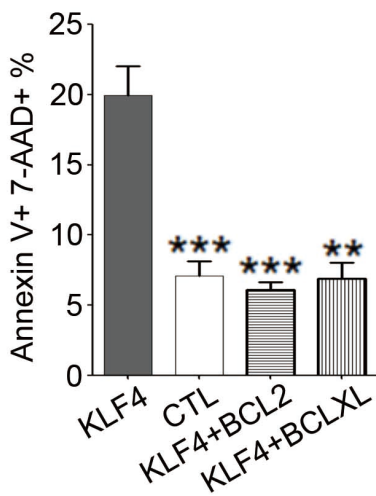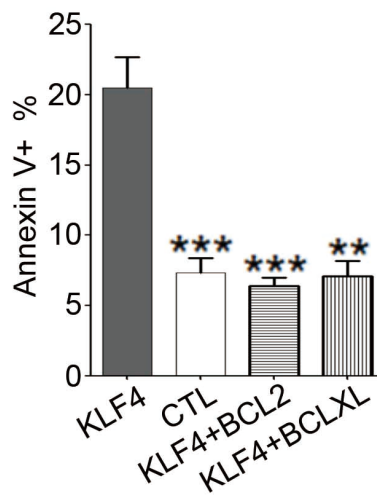

# Supplementary Figure 10

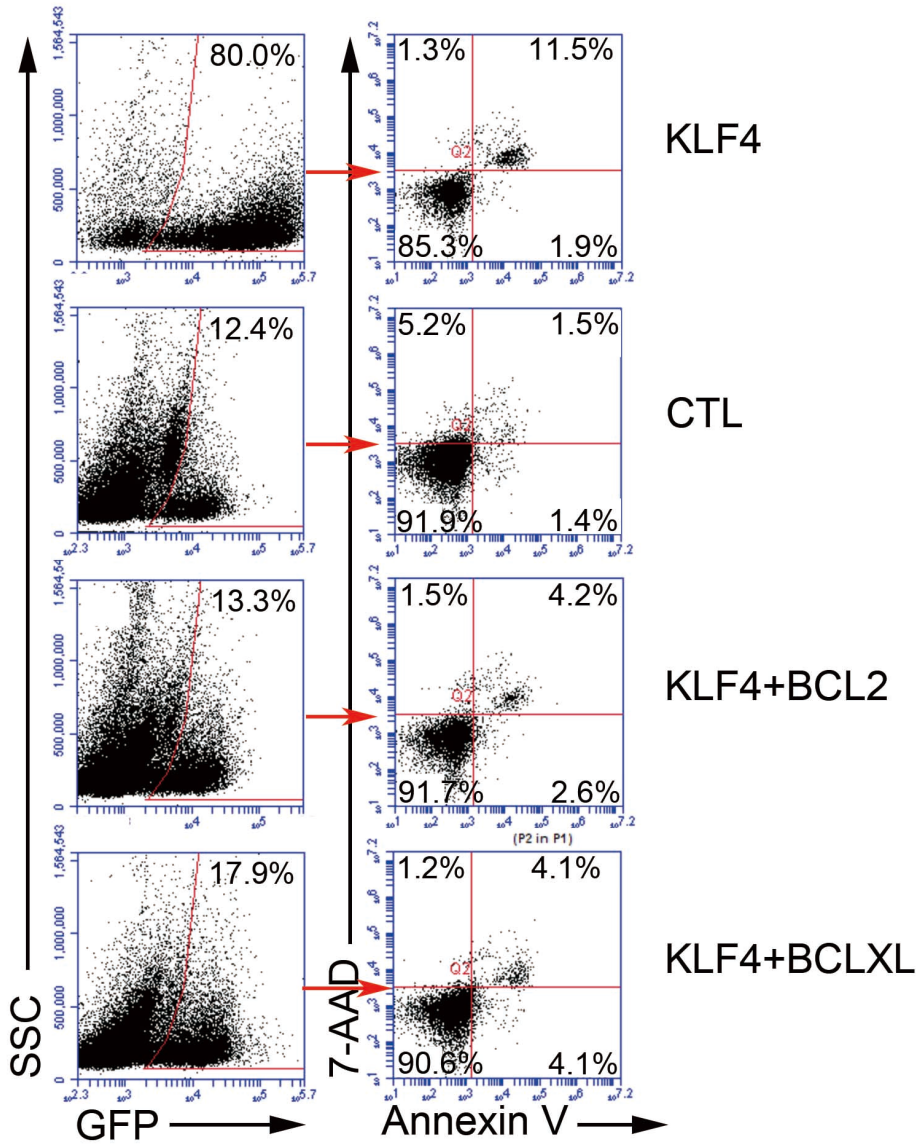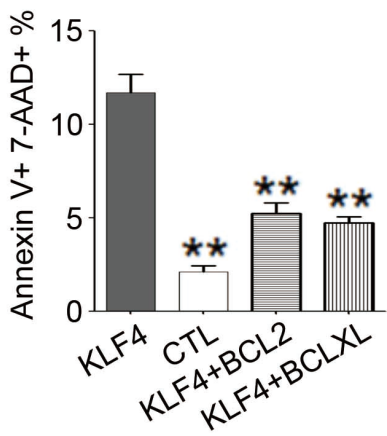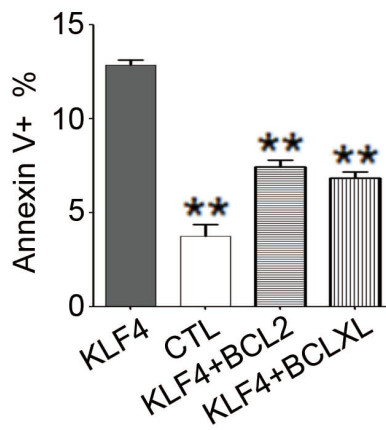

# Supplementary Figure 11

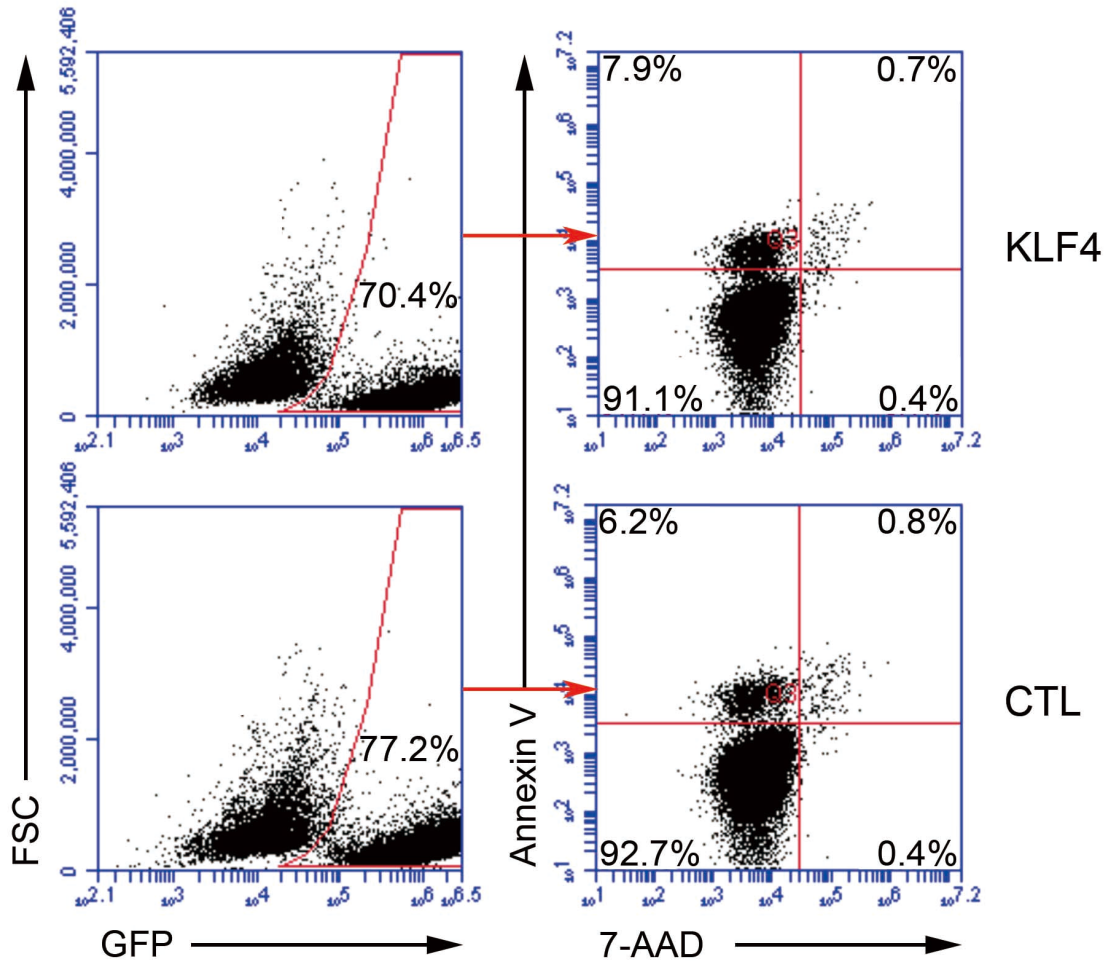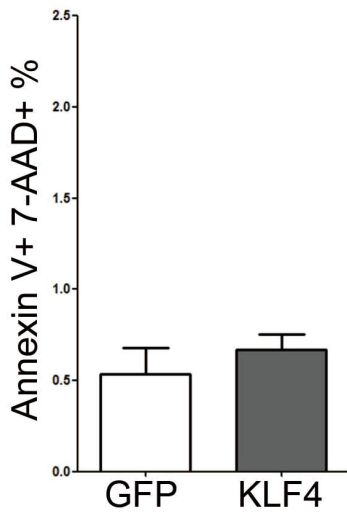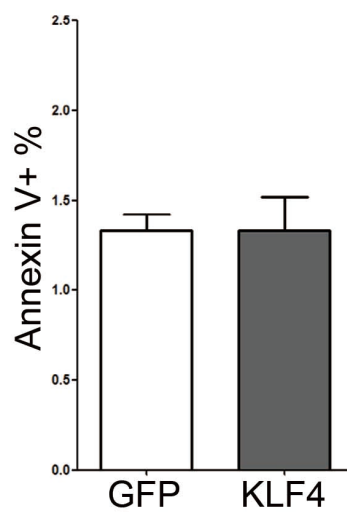

# Supplementary Figure 12

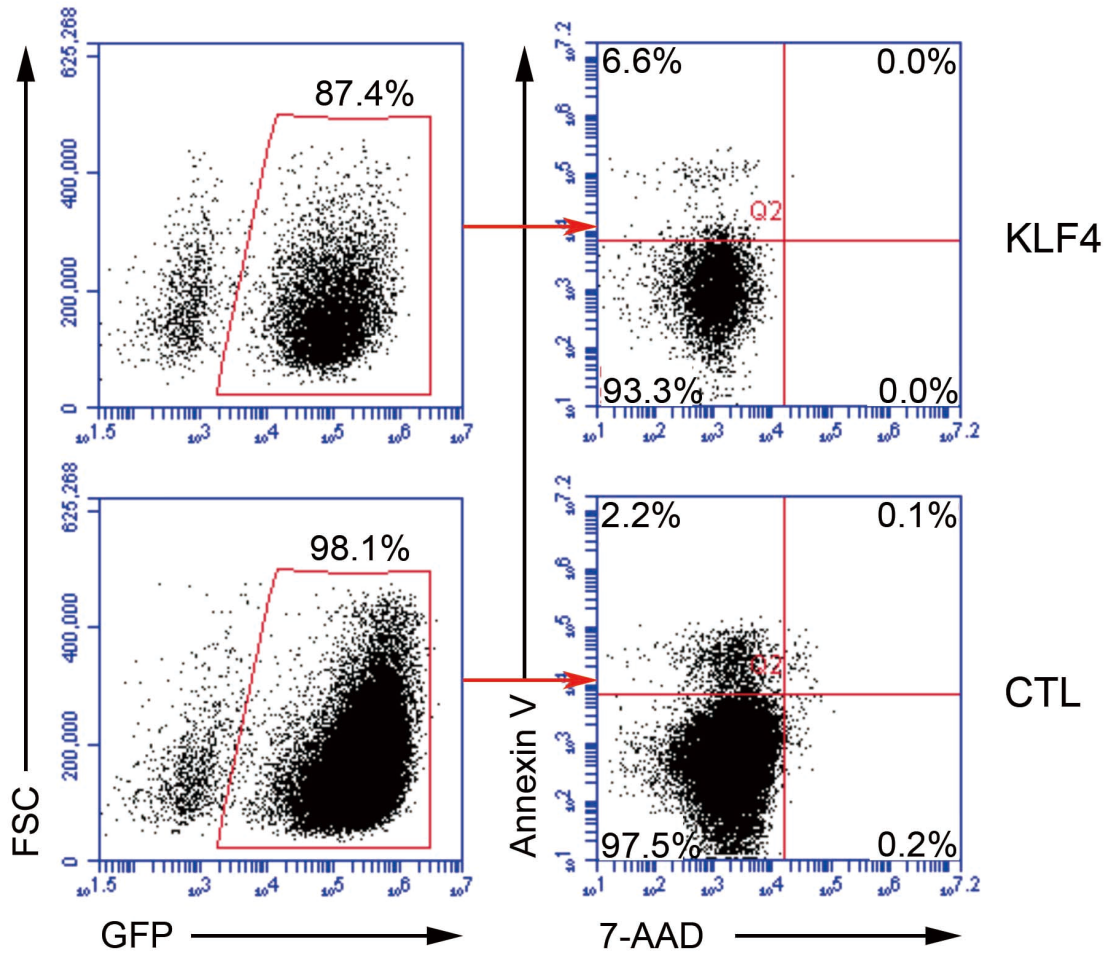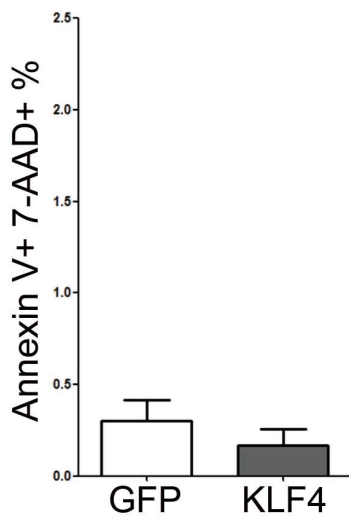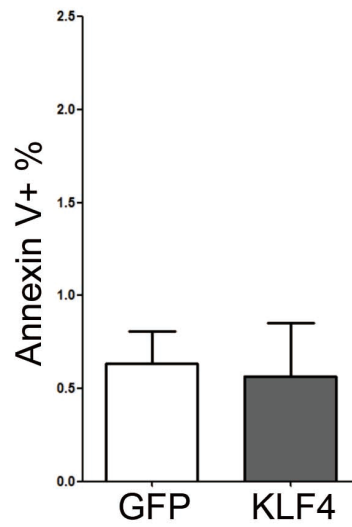

Supplementary Figure 13

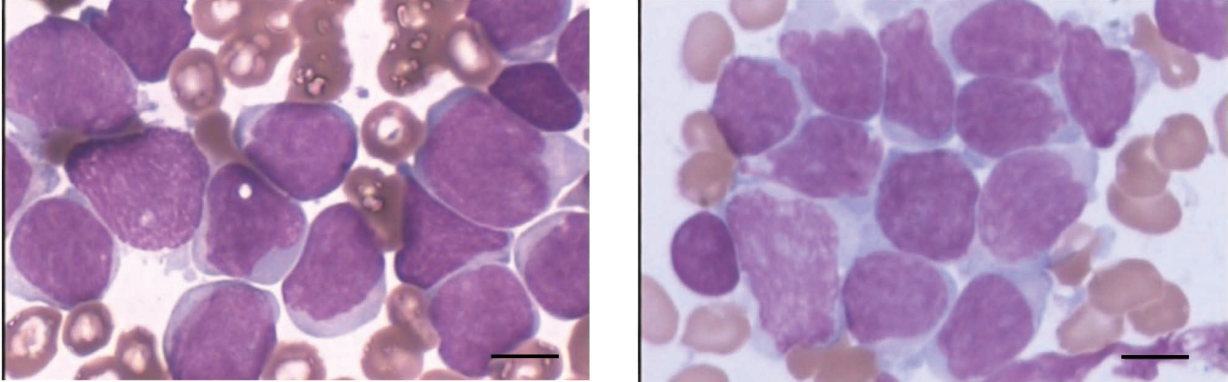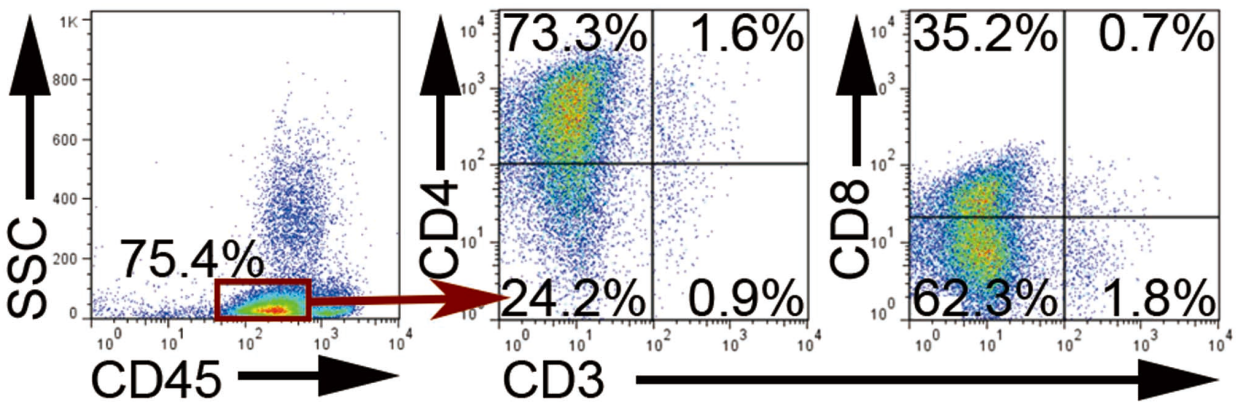

# Supplementary Figure 14

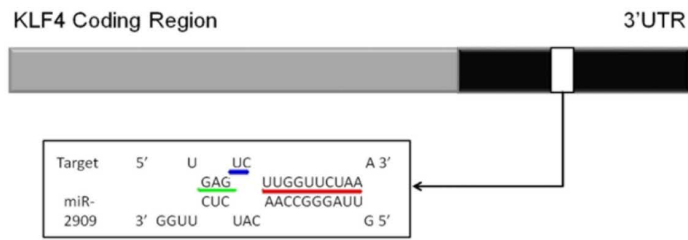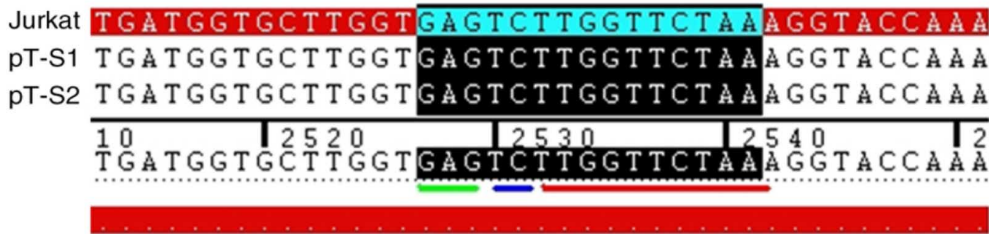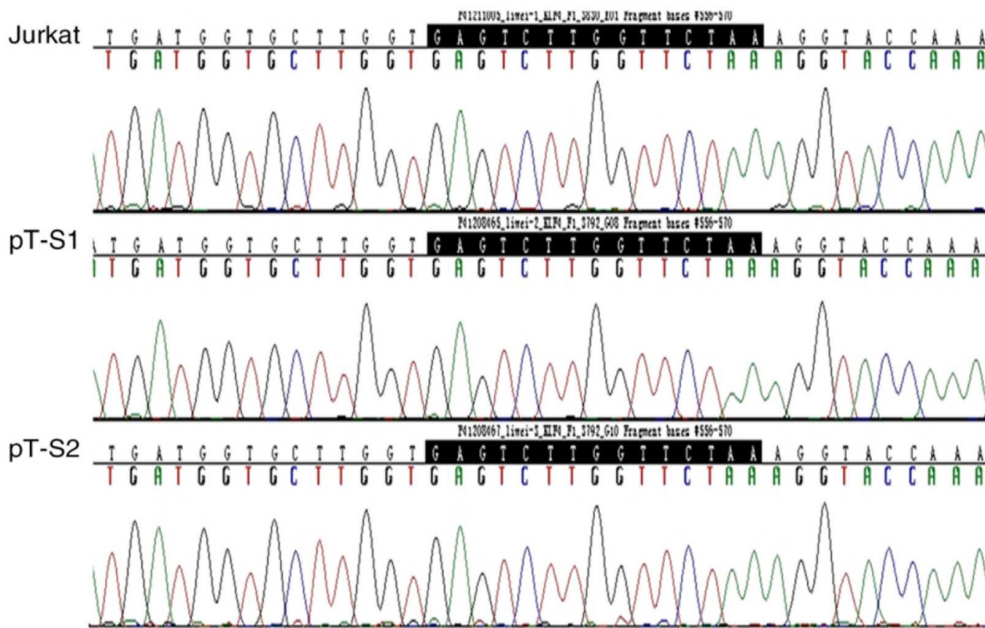

# Supplementary Figure 15

KLF4-Dox    KLF4+Dox    CTL+Dox

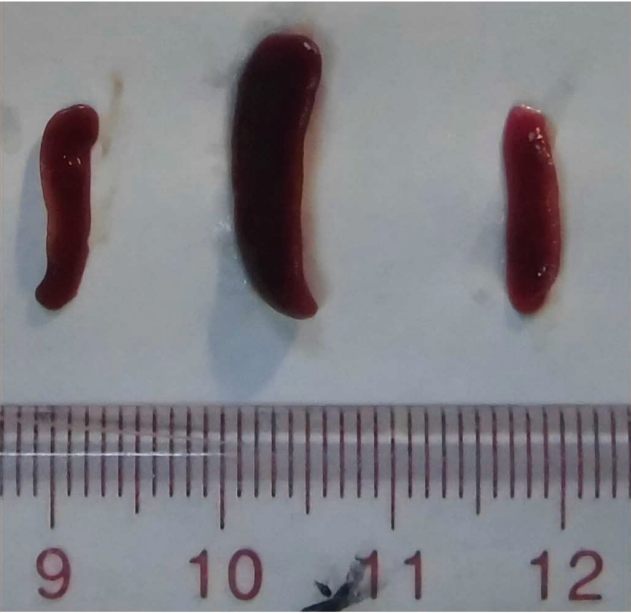

KLF4-Dox    KLF4+Dox    CTL+Dox

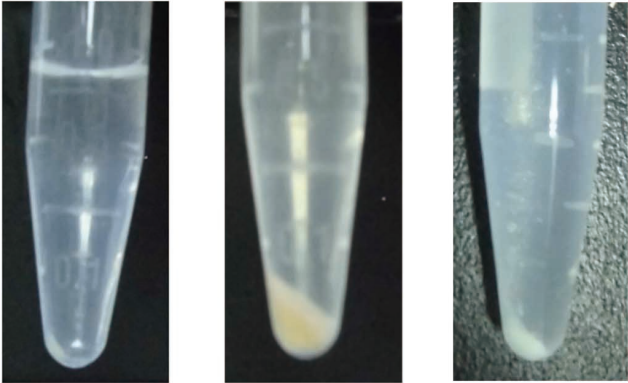

Supplementary Figure 16

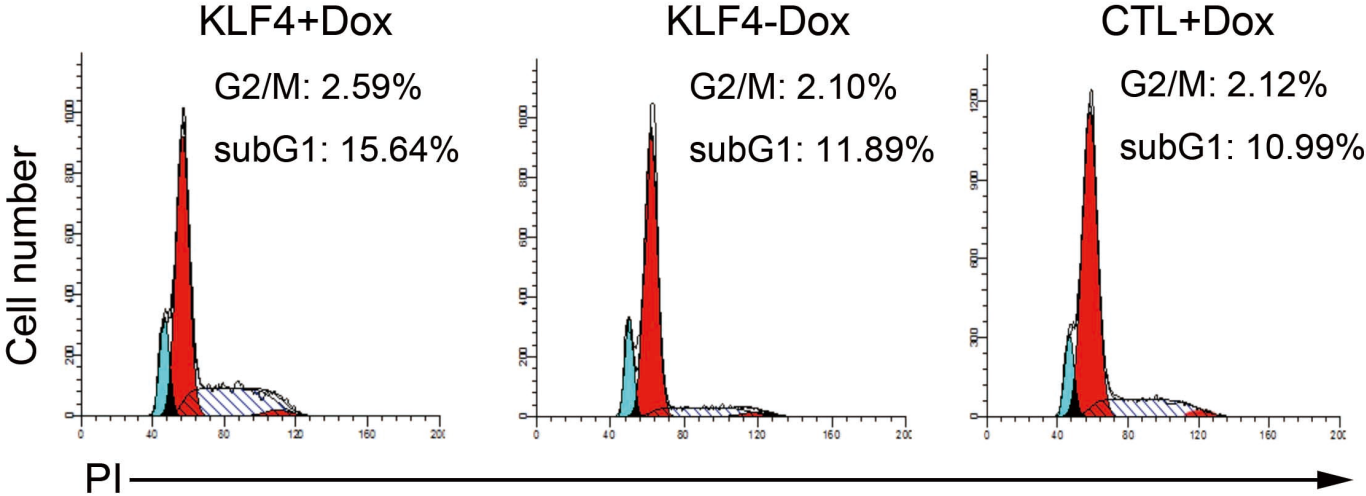



Supplementary Figure 17

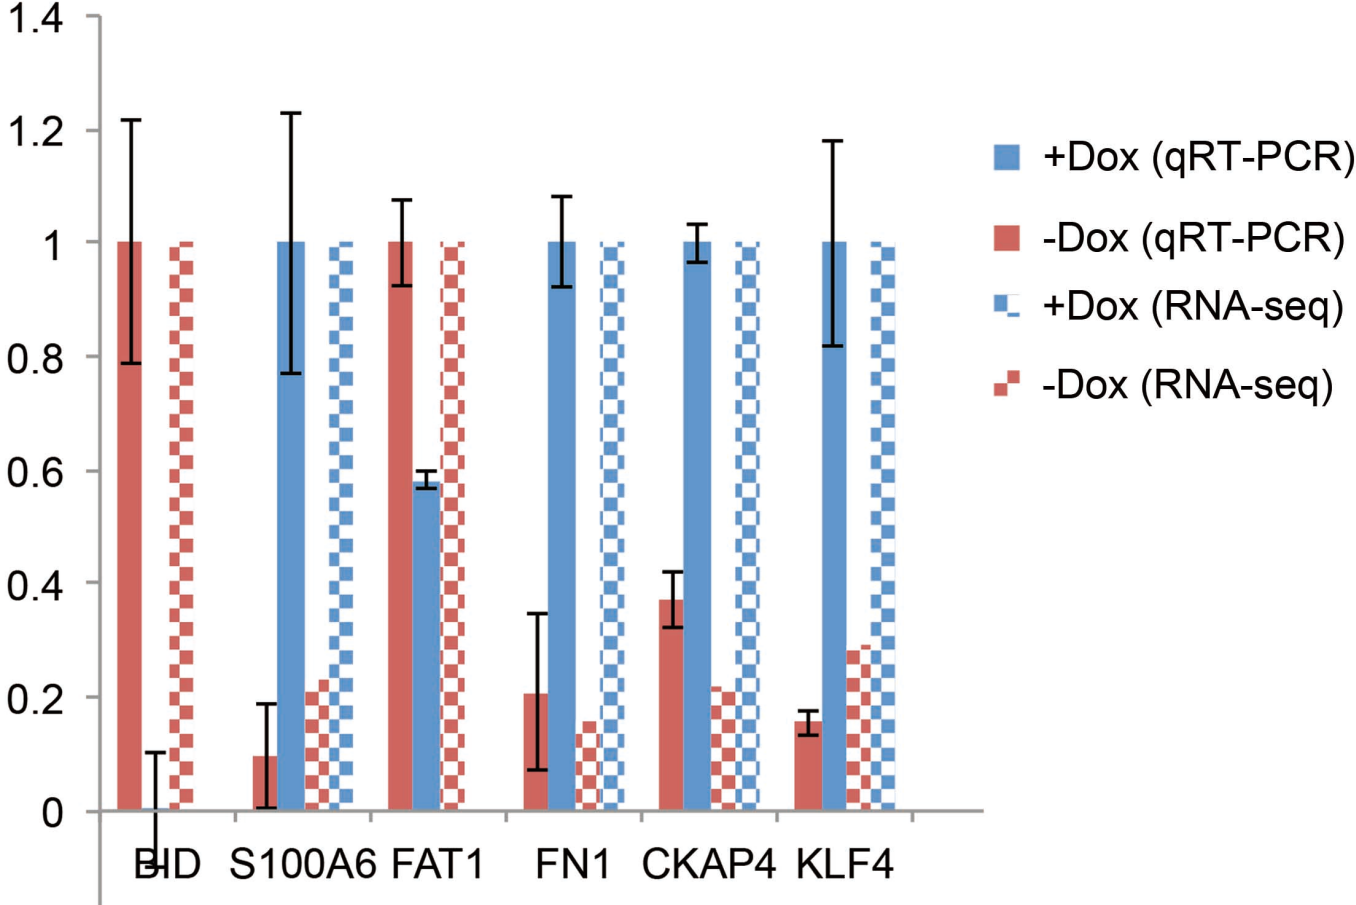

Supplementary Figure 18

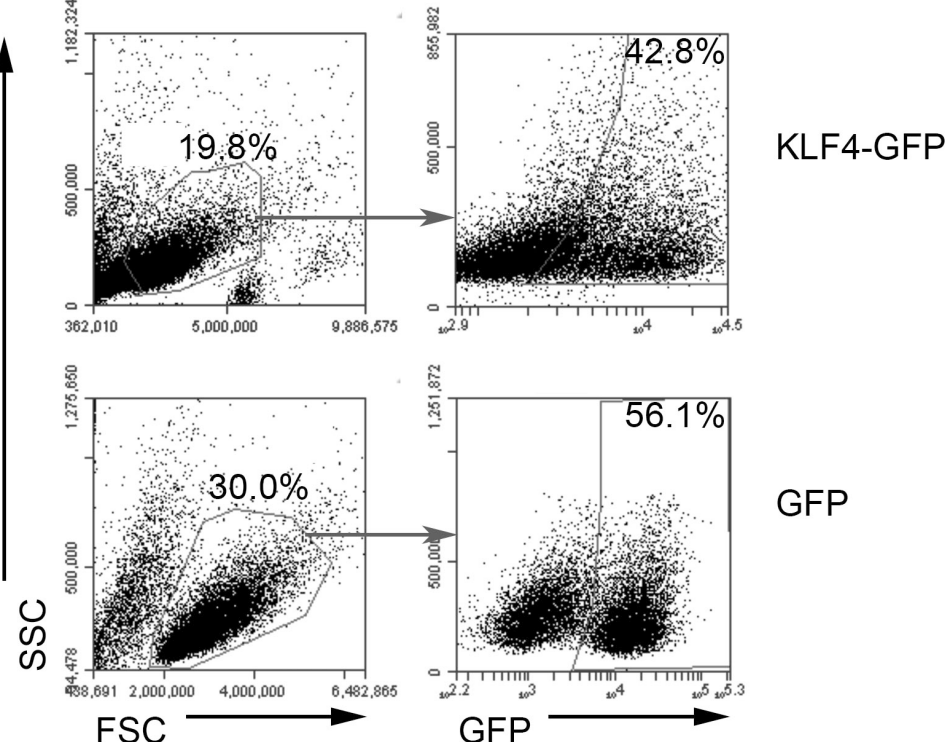

Supplementary Figure 19

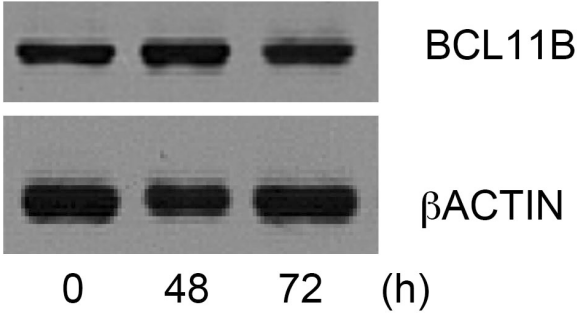

Supplement: 12943_2014_285_MOESM1_ESM.pdf [file 12943_2014_285_MOESM1_ESM.pdf]
